# Supplementary material for: Differential Effects of ABCG5/G8 Gene Region Variants on Lipid Profile, Blood Pressure Status, and Gallstone Disease History in Taiwan
Source: MDPI journal article supplement (doi:10.3390/genes14030754), 2023-03-20
Supplement: s1 [file s1]

## Supplementary Method

### *Cardiometabolic traits analyzed*

In addition to age, sex, body mass index and current smoking status and lipid profiles, the following clinical phenotypes were used in this study: waist circumference; waist–hip ratio; and systolic, mean, and diastolic blood pressure. Additionally, the following biochemical and hematological parameters were used: glucose metabolism parameters such as hemoglobin A1c (HbA1c) and fasting plasma glucose levels; liver and renal function parameters such as serum creatinine, blood urea nitrogen, aspartate aminotransferase (AST), alanine aminotransferase (ALT),  $\gamma$ -glutamyl transferase ( $\gamma$ -GT), albumin, total bilirubin, and uric acid levels; and platelet counts, white and red blood cell counts, and hemoglobin and hematocrit levels. The BMI and estimated glomerular filtration rate (eGFR) were calculated as reported previously [1]. Because of the absence of data related to urine creatinine levels, only spot urine albumin levels were used to evaluate albuminuria.

### *Definitions of metabolic syndrome*

Because medication histories were unavailable, metabolic syndrome characteristics were based on the recent update of the third report of the National Cholesterol Education Program's Adult Treatment Panel III criteria [2] with modifications. Participants with three or more of the following attributes are typically defined as having metabolic syndrome: (1) BP of  $\geq 130/85$  mmHg or a history of hypertension; (2) triglyceride level of  $\geq 150$  mg/dL; (3) high-density lipoprotein cholesterol level of  $< 40$  mg/dL for men or  $< 50$  mg/dL for women; (4) fasting plasma glucose of  $\geq 100$  mg/dL or a history of DM; and (5) waist circumference of  $> 90$  cm for men or  $> 80$  cm for women.

### **Reference:**

1. Hsu LA, Chou HH, Teng MS, Wu S, Ko YL. Circulating chemerin levels are determined through circulating platelet counts in nondiabetic Taiwanese people: A bidirectional Mendelian randomization study. *Atherosclerosis*. 2021 Mar;320:61-69.

2. Grundy SM, Cleeman JI, Daniels SR, Donato KA, Eckel RH, Franklin BA, et al. Diagnosis and management of the metabolic syndrome: an American Heart Association/National Heart, Lung, and Blood Institute Scientific Statement. *Circulation*. 2005; 11: 2735–52.

**Table S1.** Selected *ABCG5*, and *ABCG8* variants in Taiwan Biobank participants: Data derived from the whole genome sequence and Axiom Genome-Wide CHB Array plates with genotype imputation

| Ref | Gene         | SNPs         | Position<br>(GRCh37) | Ref/Alt | Intron or<br>Exon number | Exonic Function | mRNA<br>sequence | AA<br>Change. | HWE    |         | MAF#                 |                      |                |                      | SNP function          | RegulomeDB |        |
|-----|--------------|--------------|----------------------|---------|--------------------------|-----------------|------------------|---------------|--------|---------|----------------------|----------------------|----------------|----------------------|-----------------------|------------|--------|
|     |              |              |                      |         |                          |                 |                  |               | TWB    | TWB     | East Asian           | Europe               | American       | African              |                       | Rank       | Score  |
| 0   | <i>ABCG5</i> | rs374012053  | 44040355             | C/G     | 13                       | Nonsynonymous   | c.G1856C         | p.R619T       | 1      | 0.00067 | 0.00100              | 0                    | 0              | 0                    | Splicing (ESE or ESS) | 3a         | 0.3298 |
| 14  | <i>ABCG5</i> | rs6720173    | 44040401             | G/C     | 13                       | Nonsynonymous   | c.C1810G         | p.Q604E       | 0.6763 | 0.10370 | 0.12100              | 0.16400              | 0.30100        | 0.32980              |                       | 3a         | 0.7752 |
| 0   | <i>ABCG5</i> | rs200839584  | 44047133             | C/T     | 11                       | Nonsynonymous   | c.G1570A         | p.V524I       | 1      | 0.00067 | 0.00100              | 0                    | 0.00100        | 0                    |                       | 2c         | 1.0000 |
| 0   | <i>ABCG5</i> | rs199984328* | 44047175             | G/T     | 11                       | Nonsynonymous   | c.C1528A         | p.H510N       | 0.1570 | 0.00700 | 0.00400              | 0                    | 0              | 0                    |                       | 2b         | 0.7384 |
| 0   | <i>ABCG5</i> | rs139361486  | 44050052             | G/A     | 10                       | Synonymous      | c.C1347T         | p.S449S       | 1      | 0.00602 | 0.00400              | 0                    | 0              | 0                    |                       | 5          | 0.2860 |
| 0   | <i>ABCG5</i> | rs536081800* | 44050062             | C/T     | 10                       | Nonsynonymous   | c.G1337A         | p.R446Q       | 1      | 0.00040 | 0.00100              | 0                    | 0              | 0                    |                       | 5          | 0.1345 |
| 8   | <i>ABCG5</i> | rs199689137  | 44050063             | G/A     | 10                       | Nonsense        | c.C1336T         | p.R446X       | 1      | 0.00033 | 0.00190 <sup>a</sup> | 0.00005 <sup>a</sup> | 0 <sup>a</sup> | 0.00012 <sup>a</sup> |                       | 5          | 0.1345 |
| 0   | <i>ABCG5</i> | rs200597050  | 44050073             | A/G     | 9                        | Synonymous      | c.T1326C         | p.F442F       | 1      | 0.00067 | 0.00100              | 0                    | 0              | 0                    |                       | 5          | 0.4161 |
| 0   | <i>ABCG5</i> | rs575266356  | 44051065             | G/C     | 9                        | Nonsynonymous   | c.C1311G         | p.N437K       | 1      | 0.00067 | 0                    | 0                    | 0              | 0                    |                       | 5          | 0.6312 |
| 0   | <i>ABCG5</i> | rs143680435  | 44051153             | C/T     | 9                        | Nonsynonymous   | c.G1223A         | p.R408Q       | 1      | 0.00033 | 0.00100              | 0                    | 0              | 0                    |                       | 5          | 0.1345 |
| 1   | <i>ABCG5</i> | rs119480069* | 44051210             | C/T     | 8                        | Nonsynonymous   | c.G1166A         | p.R389H       | 1      | 0.00310 | 0.00100              | 0                    | 0              | 0                    |                       | 5          | 0.1345 |
| 0   | <i>ABCG5</i> | rs745606275  | 44051408             | G/C     | 8                        | Nonsynonymous   | c.C1068G         | p.F356L       | 1      | 0.00033 | 0.00030 <sup>a</sup> | 0 <sup>a</sup>       | 0 <sup>a</sup> | 0 <sup>a</sup>       |                       | 7          | 0.1841 |
| 0   | <i>ABCG5</i> | rs775348848  | 44051409             | A/T     | 8                        | Nonsynonymous   | c.T1067A         | p.F356Y       | 1      | 0.00067 | 0.00030 <sup>a</sup> | 0 <sup>a</sup>       | 0 <sup>a</sup> | 0 <sup>a</sup>       |                       | 7          | 0.1841 |
| 0   | <i>ABCG5</i> | rs748009304  | 44052032             | G/C     | 7                        | Nonsynonymous   | c.C900G          | p.F300L       | 1      | 0.00067 | 0.00100 <sup>a</sup> | 0 <sup>a</sup>       | 0 <sup>a</sup> | 0 <sup>a</sup>       |                       | 5          | 0.9583 |
| 0   | <i>ABCG5</i> | rs373182673  | 44052098             | C/T     | 7                        | Synonymous      | c.G834A          | p.A278A       | 1      | 0.00067 | 0 <sup>a</sup>       | 0.00004 <sup>a</sup> | 0 <sup>a</sup> | 0 <sup>a</sup>       |                       | 4          | 0.6091 |
| 0   | <i>ABCG5</i> | rs566982836  | 44052099             | G/A     | 7                        | Nonsynonymous   | c.C833T          | p.A278V       | 1      | 0.00067 | 0.00100              | 0                    | 0              | 0                    |                       | 4          | 0.6091 |
| 0   | <i>ABCG5</i> | rs539178581  | 44052104             | C/T     | 7                        | Synonymous      | c.G828A          | p.T276T       | 1      | 0.00067 | 0                    | 0                    | 0.00100        | 0                    |                       | 4          | 0.6091 |
| 0   | <i>ABCG5</i> | rs148186696* | 44053537             | C/T     | 6                        | Nonsynonymous   | c.G758A          | p.R253H       | 1      | 0.00040 | 0.00030 <sup>a</sup> | 0.00009 <sup>a</sup> | 0 <sup>a</sup> | 0.00005 <sup>a</sup> |                       | 5          | 0.1345 |
| 0   | <i>ABCG5</i> | rs140111105  | 44053544             | G/A     | 6                        | Nonsense        | c.C751T          | p.Q251X       | 1      | 0.00033 | 0.00018 <sup>b</sup> | 0 <sup>b</sup>       | 0 <sup>b</sup> | 0.00006 <sup>b</sup> |                       | 5          | 0.1345 |
| 0   | <i>ABCG5</i> | rs775594151  | 44055147             | G/A     | 5                        | Synonymous      | c.C609T          | p.I203I       | 1      | 0.00201 | 0 <sup>a</sup>       | 0.00004 <sup>a</sup> | 0 <sup>a</sup> | 0 <sup>a</sup>       |                       | 5          | 0.1345 |
| 0   | <i>ABCG5</i> | rs780730956  | 44055172             | G/A     | 5                        | Nonsynonymous   | c.C584T          | p.T195M       | 1      | 0.00033 | 0 <sup>a</sup>       | 0.00001 <sup>a</sup> | 0 <sup>a</sup> | 0 <sup>a</sup>       |                       | 5          | 0.1345 |
| 0   | <i>ABCG5</i> | rs767751451* | 44055213             | T/G     | 5                        | Synonymous      | c.A543C          | p.A181A       | 1      | 0.00050 | 0.00100 <sup>a</sup> | 0.00001 <sup>a</sup> | 0 <sup>a</sup> | 0 <sup>a</sup>       |                       | 5          | 0.3248 |
| 0   | <i>ABCG5</i> | rs748096191* | 44058971             | C/G     | 4                        | Nonsynonymous   | c.G438C          | p.E146D       | 1      | 0.00060 | 0 <sup>a</sup>       | 0 <sup>a</sup>       | 0 <sup>a</sup> | 0.00002 <sup>a</sup> |                       | 4          | 0.6091 |
| 17  | <i>ABCG5</i> | rs6756629*   | 44065090             | G/A     | 2                        | Nonsynonymous   | c.C148T          | p.R50C        | 0.6410 | 0.01500 | 0.01390              | 0.07550              | 0.09900        | 0.10290              | Splicing (ESE or ESS) | 5          | 0.1345 |
| 0   | <i>ABCG5</i> | rs72542426   | 44065680             | C/G     | 1                        | Nonsynonymous   | c.G139C          | p.V47L        | 1      | 0.00067 | 0                    | 0                    | 0.00300        | 0.01440              |                       | 4          | 0.6091 |
| 0   | <i>ABCG5</i> | rs781098379  | 44065755             | G/A     | 1                        | Nonsense        | c.C64T           | p.Q22X        | 1      | 0.00067 | 0.00010 <sup>b</sup> | 0.00004 <sup>b</sup> | 0 <sup>b</sup> | 0 <sup>b</sup>       |                       | 4          | 0.6091 |
| 0   | <i>ABCG5</i> | rs200471843  | 44065786             | C/A     | 1                        | Synonymous      | c.G33T           | p.G11G        | 1      | 0.00335 | 0.00100              | 0                    | 0              | 0                    |                       | 4          | 0.6091 |

|    |             |              |          |     |          |               |         |         |        |         |                      |                      |                      |                      |                       |    |        |
|----|-------------|--------------|----------|-----|----------|---------------|---------|---------|--------|---------|----------------------|----------------------|----------------------|----------------------|-----------------------|----|--------|
| 0  | ABCG5       | rs72542428   | 44065792 | G/A | 1        | Synonymous    | c.C27T  | p.P9P   | 0.1636 | 0.01104 | 0.00890              | 0                    | 0.00100              | 0                    |                       | 2a | 0.6541 |
| 0  | ABCG5       | rs560839317* | 44065894 | G/A | 5'UTR    | --            | --      | --      | 1      | 0.00130 | 0.00100              | 0                    | 0                    | 0                    |                       | 2b | 0.5881 |
| 0  | ABCG5       | rs189132480* | 44065924 | C/T | 5'UTR    | --            | --      | --      | 1      | 0.00100 | 0.00200              | 0                    | 0                    | 0                    |                       | 2b | 0.6958 |
| 0  | ABCG5;ABCG8 | rs138510485  | 44065996 | C/T | upstream | --            | --      | --      | 1      | 0.00033 | 0.00200              | 0                    | 0                    | 0                    |                       | 4  | 0.6091 |
| 0  | ABCG5;ABCG8 | rs913853612  | 44066072 | G/A | upstream | --            | --      | --      | 1      | 0.00033 | 0 <sup>a</sup>       | 0.00005 <sup>a</sup> | 0 <sup>a</sup>       | 0.00012 <sup>a</sup> |                       | 4  | 0.6091 |
| 6  | ABCG8       | rs3806471    | 44066174 | T/G | 5'UTR    | --            | --      | --      | 0.5314 | 0.14460 | 0.84230              | 0.29720              | 0.35600              | 0.39790              | TFBS                  | 4  | 0.6091 |
| 0  | ABCG8       | rs200951677  | 44066207 | G/A | 1        | Synonymous    | c.G15A  | p.A5A   | 1      | 0.00033 | 0.00100              | 0                    | 0                    | 0                    |                       | 4  | 0.6091 |
| 32 | ABCG8       | rs11887534*  | 44066247 | G/C | 1        | Nonsynonymous | c.G55C  | p.D19H  | 0.7100 | 0.01510 | 0.01390              | 0.07950              | 0.09700              | 0.07640              | Splicing (ESE or ESS) | 4  | 0.6091 |
| 11 | ABCG8       | rs4148211    | 44071743 | A/G | 2        | Nonsynonymous | c.A161G | p.Y54C  | 0.6276 | 0.12150 | 0.85120              | 0.37080              | 0.35000              | 0.12930              | Splicing (ESE or ESS) | 4  | 0.6091 |
| 0  | ABCG8       | rs754458742  | 44078728 | G/A | 4        | Nonsynonymous | c.G328A | p.G110R | 1      | 0.00033 | 0.00004 <sup>b</sup> | 0 <sup>b</sup>       | 0 <sup>b</sup>       | 0 <sup>b</sup>       |                       | 5  | 0.1345 |
| 0  | ABCG8       | rs968485818  | 44078789 | G/T | 4        | Nonsynonymous | c.G389T | p.G130V | 1      | 0.00033 | 0 <sup>c</sup>       | 0 <sup>c</sup>       | 0 <sup>c</sup>       | 0 <sup>c</sup>       |                       | 5  | 0.0523 |
| 0  | ABCG8       | rs756189400  | 44078829 | G/A | 4        | Synonymous    | c.G429A | p.L143L | 1      | 0.00033 | 0.00008 <sup>b</sup> | 0 <sup>b</sup>       | 0 <sup>b</sup>       | 0 <sup>b</sup>       |                       | 5  | 0.5800 |
| 0  | ABCG8       | rs56132765*  | 44078853 | G/A | 4        | Synonymous    | c.G453A | p.V151V | 0.7820 | 0.01530 | 0.01390              | 0.07260              | 0.09200              | 0.09460              |                       | 5  | 0.0000 |
| 0  | ABCG8       | rs750352877* | 44078879 | A/G | 4        | Nonsynonymous | c.A479G | p.N160S | 1      | 0.00070 | 0 <sup>a</sup>       | 0.00001 <sup>a</sup> | 0.00007 <sup>a</sup> | 0 <sup>a</sup>       |                       | 5  | 0.0231 |
| 0  | ABCG8       | rs762440574  | 44078921 | G/A | 4        | Nonsynonymous | c.G521A | p.R174Q | 1      | 0.00033 | 0 <sup>a</sup>       | 0 <sup>a</sup>       | 0.00015 <sup>a</sup> | 0 <sup>a</sup>       |                       | 5  | 0.1345 |
| 0  | ABCG8       | rs201121311  | 44079502 | G/A | 5        | Nonsynonymous | c.G571A | p.V191M | 1      | 0.00033 | 0.00100              | 0                    | 0                    | 0                    |                       | 4  | 0.6091 |
| 0  | ABCG8       | rs9282574    | 44079559 | G/A | 5        | Nonsynonymous | c.G628A | p.V210M | 1      | 0.00201 | 0                    | 0                    | 0.00700              | 0.06510              | Splicing (ESE or ESS) | 3a | 0.8507 |
| 0  | ABCG8       | rs267599381  | 44079620 | A/G | 5        | Nonsynonymous | c.A689G | p.N230S | 1      | 0.00033 | 0.00002 <sup>b</sup> | 0 <sup>b</sup>       | 0 <sup>b</sup>       | 0 <sup>b</sup>       |                       | 4  | 0.6091 |
| 0  | ABCG8       | rs199737442  | 44079829 | C/A | 6        | Nonsynonymous | c.C786A | p.N262K | 1      | 0.00100 | 0.00100              | 0                    | 0                    | 0                    |                       | 4  | 0.6091 |
| 1  | ABCG8       | rs137852990  | 44079831 | G/A | 6        | Nonsynonymous | c.G788A | p.R263Q | 1      | 0.00100 | 0.00100              | 0.00100              | 0                    | 0                    |                       | 4  | 0.6091 |
| 0  | ABCG8       | rs775468682  | 44079861 | G/A | 6        | Nonsynonymous | c.G818A | p.R273H | 1      | 0.00033 | 0.00004 <sup>b</sup> | 0.00002 <sup>b</sup> | 0.00006 <sup>b</sup> | 0 <sup>b</sup>       |                       | 4  | 0.6091 |
| 0  | ABCG8       | rs117221284  | 44079913 | C/T | 6        | Synonymous    | c.C870T | p.T290T | 1      | 0.00770 | 0.00600              | 0                    | 0                    | 0                    |                       | 5  | 0.1550 |
| 0  | ABCG8       | rs745365455  | 44079981 | G/A | 6        | Nonsynonymous | c.G938A | p.R313H | 1      | 0.00033 | 0.00002 <sup>b</sup> | 0.00002 <sup>b</sup> | 0 <sup>b</sup>       | 0 <sup>b</sup>       |                       | 5  | 0.1345 |

Chr: chromosome, SNP: single nucleotide polymorphism, Ref/Alt: reference/alternate allele, HWE: Hardy-Weinberg equilibrium, MAF: minor allele frequency, mRNA: messenger RNA, AA: amino acid, 5'UTR: 5' untranslated region, ESE or ESS: exon splicing enhancer or exon splicing silencer, TFBS: transcriptional factor binding site.

\*Single nucleotide polymorphism available on the Axiom Genome-Wide CHB Array plates with genotype imputation of Taiwan biobank (TWB) data.

HWE and MAF (TWB) data were derived from Axiom Genome-Wide CHB Array plates with genotype imputation of Taiwan biobank (TWB), or if not available, from whole genome sequence of TWB data.

# MAF (except for TWB) was mainly accessed from 1000 Genomes Project and if the data from 1000 Genomes Project was not available, gnomAD-Genomes (label as "a"), gnomAD-Exomes (label as "b"), and dbGaP Population Frequency (label as "c") on the PubMed website were used.

SNP function information was obtained from SNPinfo Web Server.

RegulomeDB Rank and Score information was obtained from RegulomeDB database. The lower rank indicates the more evidences that the SNP may be located in a functional region and the scores, ranging from 0 to 1, which was closer to 1, the more possibility that the SNP would play a regulatory role.

**Table S2.** Lead single nucleotide polymorphisms (SNPs) for various phenotypes at the *ABCG5*, *ABCG8* and *PLEKHH2* gene region: Data derived from the Axiom Genome-Wide CHB Array plates with genotype imputation

| Chr | Gene           | Associated phenotypes                     | SNPs        | Position<br>(GRCh37) | Ref/Alt | Intron or<br>Exon<br>number | Exonic<br>Function | mRNA<br>sequence | AA<br>Change. | HWE    | MAF#    |         |               | SNP function |          |         | RegulomeDB |            |
|-----|----------------|-------------------------------------------|-------------|----------------------|---------|-----------------------------|--------------------|------------------|---------------|--------|---------|---------|---------------|--------------|----------|---------|------------|------------|
|     |                |                                           |             |                      |         |                             |                    |                  |               |        | TWB     | TWB     | East<br>Asian | Europe       | American | African |            | Rank Score |
| 2   | <i>PLEKHH2</i> | Total, LDL and non-HDL cholesterol levels | rs75832441  | 43965298             | G/A     | Intron                      | --                 | --               | --            | 0.6150 | 0.01040 | 0.00800 | 0.02600       | 0.05300      | 0.01880  | --      | 5          | 0.1345     |
| 2   | <i>PLEKHH2</i> | Mean blood pressure                       | rs7596913   | 43975512             | G/C     | Intron                      | --                 | --               | --            | 0.8851 | 0.19600 | 0.17660 | 0.28330       | 0.45100      | 0.81620  | --      | 5          | 0.8994     |
| 2   | <i>PLEKHH2</i> | Diastolic blood pressure                  | rs2060173   | 43975957             | A/G     | Intron                      | --                 | --               | --            | 0.8500 | 0.19700 | 0.17760 | 0.28330       | 0.45100      | 0.81540  | --      | 5          | 0.5896     |
| 2   | <i>ABCG5</i>   | Gallstone disease history                 | rs115445558 | 44063098             | G/T     | Intron                      | --                 | --               | --            | 0.1980 | 0.01540 | 0.07950 | 0.09900       | 0.10290      | 0.01690  | --      | 6          | 0.1865     |

Abbreviation as in Supplementary Table 1.±

# MAF (except for TWB) was accessed from 1000 Genomes Project on the PUBMed website.

SNP function information was obtained from SNPinfo Web Server.

RegulomeDB Rank and Score information was obtained from RegulomeDB database. The lower rank indicates the more evidences that the SNP may be located in a functional region and the scores, ranging from 0 to 1, which was closer to 1, the more possibility that the SNP would play a regulatory role.

**Table S3.** Phenotype–genotype associations of *ABCG5* and *ABCG8* exonic mutations and promoter variants with no significant association with lipid profile or gallstone disease history

| Genetic variants                        | Genotypes             |                       |        | <i>p</i> 1 value* | Beta    | SE     | <i>p</i> 2 value* |
|-----------------------------------------|-----------------------|-----------------------|--------|-------------------|---------|--------|-------------------|
| <i>ABCG5</i> rs536081800 (108,518)      | CC (108,427)          | CT (91)               | TT (0) |                   |         |        |                   |
| Total cholesterol# (mg/dL)              | 193.0 (171.0 - 217.0) | 205.0 (174.0 - 228.0) | --     | 0.0257            | 0.0164  | 0.0082 | 0.0458            |
| LDL cholesterol# (mg/dL)                | 119.0 (99.0 - 141.0)  | 127.0 (101.0 - 148.0) | --     | 0.2069            | 0.0167  | 0.0120 | 0.1640            |
| Non-HDL cholesterol# (mg/dL)            | 138.0 (116.0 - 162.0) | 146.0 (121.0 - 171.0) | --     | 0.0707            | 0.0226  | 0.0108 | 0.0369            |
| HDL cholesterol# (mg/dL)                | 53.0 (45.0 - 63.0)    | 54.0 (47.0 - 66.0)    | --     | 0.3073            | 0.0048  | 0.0097 | 0.6245            |
| Triglyceride# (mg/dL)                   | 91.0 (64.0 - 133.0)   | 90.0 (58.0 - 133.0)   | --     | 0.6128            | 0.0234  | 0.0227 | 0.3035            |
| Remnant cholesterol# (mg/dL)            | 16.0 (11.5 - 23.0)    | 17.0 (10.0 - 26.0)    | --     | 0.6501            | 0.0036  | 0.0283 | 0.8986            |
| Gallstone disease (%)                   | 4.55% (5332)          | 7.22% (7)             | --     | 0.2079            | 0.5202  | 0.3969 | 0.1899            |
| Family history of gallstone disease (%) | 7.53% (8828)          | 7.22% (7)             | --     | 0.9060            | -0.0554 | 0.3926 | 0.8877            |
| <i>ABCG5</i> rs148186696 (108,866)      | CC (108,775)          | CT (91)               | TT (0) |                   |         |        |                   |
| Total cholesterol# (mg/dL)              | 193.0 (171.0 - 217.0) | 202.0 (175.0 - 219.0) | --     | 0.0593            | 0.0125  | 0.0082 | 0.1284            |
| LDL cholesterol# (mg/dL)                | 119.0 (99.0 - 141.0)  | 123.0 (108.0 - 144.0) | --     | 0.0443            | 0.0263  | 0.0120 | 0.0281            |
| Non-HDL cholesterol# (mg/dL)            | 138.0 (116.0 - 162.0) | 145.0 (123.0 - 168.0) | --     | 0.0784            | 0.0225  | 0.0108 | 0.0375            |
| HDL cholesterol# (mg/dL)                | 53.0 (45.0 - 63.0)    | 52.0 (44.0 - 60.0)    | --     | 0.8802            | 0.0046  | 0.0097 | 0.6356            |
| Triglyceride# (mg/dL)                   | 91.0 (64.0 - 133.0)   | 93.0 (61.0 - 138.0)   | --     | 0.7608            | 0.0066  | 0.0227 | 0.7707            |
| Remnant cholesterol# (mg/dL)            | 16.0 (11.0 - 23.0)    | 16.0 (13.0 - 24.0)    | --     | 0.6214            | 0.0128  | 0.0283 | 0.6515            |
| Gallstone disease (%)                   | 4.56% (5356)          | 3.00% (3)             | --     | 0.4557            | -0.3797 | 0.5897 | 0.5197            |
| Family history of gallstone disease (%) | 7.54% (8860)          | 6.00% (6)             | --     | 0.5607            | -0.2548 | 0.4213 | 0.5453            |
| <i>ABCG5</i> rs767751451 (108,226)      | TT (108,123)          | TG (103)              | GG (0) |                   |         |        |                   |
| Total cholesterol# (mg/dL)              | 193.0 (171.0 - 217.0) | 196.0 (172.0 - 216.0) | --     | 0.6973            | -0.0009 | 0.0077 | 0.9105            |
| LDL cholesterol# (mg/dL)                | 119.0 (99.0 - 141.0)  | 121.0 (100.0 - 141.0) | --     | 0.6731            | 0.0007  | 0.0113 | 0.9487            |
| Non-HDL cholesterol# (mg/dL)            | 138.0 (116.0 - 162.0) | 139.0 (118.0 - 162.0) | --     | 0.9362            | -0.0056 | 0.0102 | 0.5825            |
| HDL cholesterol# (mg/dL)                | 53.0 (45.0 - 63.0)    | 56.0 (47.0 - 65.0)    | --     | 0.1860            | 0.0148  | 0.0091 | 0.1052            |
| Triglyceride# (mg/dL)                   | 91.0 (64.0 - 133.0)   | 87.0 (65.0 - 118.0)   | --     | 0.3885            | -0.0289 | 0.0213 | 0.1752            |
| Remnant cholesterol# (mg/dL)            | 16.0 (11.0 - 23.0)    | 16.0 (11.0 - 22.0)    | --     | 0.4274            | -0.0276 | 0.0266 | 0.3004            |
| Gallstone disease (%)                   | 4.56% (5328)          | 5.71% (6)             | --     | 0.5705            | 0.2149  | 0.4234 | 0.6117            |
| Family history of gallstone disease (%) | 7.55% (8818)          | 5.71% (6)             | --     | 0.4777            | -0.3002 | 0.4206 | 0.4755            |
| <i>ABCG5</i> rs189132480 (108,607)      | CC (108,375)          | CT (232)              | TT (0) |                   |         |        |                   |
| Total cholesterol# (mg/dL)              | 193.0 (171.0 - 217.0) | 196.0 (175.0 - 215.0) | --     | 0.4260            | 0.0019  | 0.0051 | 0.7054            |
| LDL cholesterol# (mg/dL)                | 119.0 (99.0 - 141.0)  | 121.0 (99.3 - 140.0)  | --     | 0.6997            | 0.0012  | 0.0075 | 0.8691            |
| Non-HDL cholesterol# (mg/dL)            | 138.0 (116.0 - 162.0) | 139.0 (117.0 - 159.8) | --     | 0.7454            | 0.00003 | 0.0068 | 0.9966            |
| HDL cholesterol# (mg/dL)                | 53.0 (45.0 - 63.0)    | 56.0 (46.3 - 64.0)    | --     | 0.1462            | 0.0122  | 0.0060 | 0.0429            |
| Triglyceride# (mg/dL)                   | 91.0 (64.0 - 133.0)   | 91.0 (66.0 - 127.8)   | --     | 0.8801            | -0.0108 | 0.0141 | 0.4454            |
| Remnant cholesterol# (mg/dL)            | 16.0 (11.0 - 23.0)    | 16.0 (11.0 - 22.0)    | --     | 0.6702            | -0.0032 | 0.0177 | 0.8551            |
| Gallstone disease (%)                   | 4.56% (5336)          | 6.10% (15)            | --     | 0.2468            | 0.2859  | 0.2690 | 0.2879            |
| Family history of gallstone disease (%) | 7.54% (8829)          | 8.54% (21)            | --     | 0.5533            | 0.1379  | 0.2285 | 0.5463            |
| <i>ABCG8</i> rs750352877 (108,404)      | AA (108,260)          | AG (144)              | GG (0) |                   |         |        |                   |
| Total cholesterol# (mg/dL)              | 193.0 (171.0 - 217.0) | 196.5 (167.3 - 216.0) | --     | 0.7794            | -0.0009 | 0.0064 | 0.8946            |
| LDL cholesterol# (mg/dL)                | 119.0 (99.0 - 141.0)  | 115.5 (99.0 - 141.0)  | --     | 0.5562            | -0.0073 | 0.0095 | 0.4410            |
| Non-HDL cholesterol# (mg/dL)            | 138.0 (116.0 - 162.0) | 137.0 (113.0 - 162.8) | --     | 0.5662            | -0.0072 | 0.0086 | 0.4020            |
| HDL cholesterol# (mg/dL)                | 53.0 (45.0 - 63.0)    | 55.0 (45.0 - 63.8)    | --     | 0.6889            | -0.0012 | 0.0076 | 0.8709            |
| Triglyceride# (mg/dL)                   | 91.0 (64.0 - 133.0)   | 87.0 (66.0 - 126.5)   | --     | 0.7174            | -0.0064 | 0.0178 | 0.7178            |
| Remnant cholesterol# (mg/dL)            | 16.0 (11.0 - 23.0)    | 17.0 (11.3 - 25.0)    | --     | 0.4734            | 0.0151  | 0.0225 | 0.5018            |
| Gallstone disease (%)                   | 4.56% (5326)          | 3.07% (5)             | --     | 0.3634            | -0.4899 | 0.4564 | 0.2831            |
| Family history of gallstone disease (%) | 7.54% (8824)          | 6.75% (11)            | --     | 0.7015            | -0.1247 | 0.3125 | 0.6899            |

Data presented as median (interquartile range).

Abbreviation as in Table 1.

Number of the participants shown in brackets after the genotypes.

# Participants were analyzed after the exclusion of those with a history of hyperlipidemia.

\**p*1 value: unadjusted; *p*2 value: adjusted for age, sex, BMI, and current smoking.

**Table S4.** The multicollinearity between the lipid levels in the stepwise multiple linear regression model. The *ABCG5* rs75832441 has the lowest tolerance (0.319, that is <0.4) for all three phenotypes analyzed. Thus, we removed *ABCG5* rs7583244 (since lowest tolerance) from the model in Table 3.

| Model                     | Unstandardised Coefficients |            | Standardised Coefficients | T        | Sig.  | Collinearity Statistics |       |
|---------------------------|-----------------------------|------------|---------------------------|----------|-------|-------------------------|-------|
|                           | B                           | Std. Error | Beta                      |          |       | Tolerance               | VIF   |
| Total cholesterol level   |                             |            |                           |          |       |                         |       |
| (Constant)                | 2.168                       | .002       |                           | 1000.319 | 0.000 |                         |       |
| AGE                       | .001                        | .000       | .167                      | 58.250   | 0.000 | 1.000                   | 1.000 |
| SEX                       | .015                        | .001       | .090                      | 27.298   | .000  | .755                    | 1.325 |
| BMI                       | .001                        | .000       | .061                      | 20.618   | .000  | .946                    | 1.057 |
| SMK                       | .000                        | .001       | -.002                     | -.682    | .495  | .780                    | 1.283 |
| <i>ABCG5</i> rs119480069  | .025                        | .003       | .025                      | 8.627    | .000  | 1.000                   | 1.000 |
| <i>ABCG5</i> rs199984328  | .008                        | .003       | .012                      | 2.273    | .023  | .319                    | 3.133 |
| <i>ABCG5</i> rs560839317  | .019                        | .004       | .012                      | 4.178    | .000  | 1.000                   | 1.000 |
| <i>ABCG5</i> rs748096191  | .024                        | .007       | .010                      | 3.503    | .000  | 1.000                   | 1.000 |
| <i>ABCG5</i> rs75832441   | .004                        | .003       | .008                      | 1.496    | .135  | .319                    | 3.133 |
| LDL cholesterol level     |                             |            |                           |          |       |                         |       |
| (Constant)                | 1.904                       | .003       |                           | 585.093  | 0.000 |                         |       |
| AGE                       | .001                        | .000       | .109                      | 37.728   | 0.000 | 1.000                   | 1.000 |
| SEX                       | .001                        | .001       | .003                      | .935     | .350  | .755                    | 1.325 |
| BMI                       | .004                        | .000       | .137                      | 46.313   | 0.000 | .946                    | 1.057 |
| SMK                       | -.005                       | .001       | -.016                     | -4.837   | .000  | .780                    | 1.283 |
| <i>ABCG5</i> rs119480069  | .039                        | .004       | .026                      | 8.909    | .000  | 1.000                   | 1.000 |
| <i>ABCG5</i> rs199984328  | .016                        | .005       | .016                      | 3.069    | .002  | .319                    | 3.133 |
| <i>ABCG5</i> rs560839317  | .023                        | .007       | .010                      | 3.524    | .000  | 1.000                   | 1.000 |
| <i>ABCG5</i> rs748096191  | .036                        | .010       | .010                      | 3.552    | .000  | 1.000                   | 1.000 |
| <i>ABCG5</i> rs75832441   | .004                        | .004       | .004                      | .832     | .405  | .319                    | 3.133 |
| Non-HDL cholesterol level |                             |            |                           |          |       |                         |       |
| (Constant)                | 1.846                       | .003       |                           | 725.514  | 0.000 |                         |       |
| AGE                       | 9.470E-05                   | .000       | .010                      | 3.860    | .000  | 1.000                   | 1.000 |
| SEX                       | .063                        | .001       | .286                      | 98.218   | 0.000 | .755                    | 1.325 |
| BMI                       | -.009                       | .000       | -.337                     | -129.740 | 0.000 | .946                    | 1.057 |
| SMK                       | -.011                       | .001       | -.042                     | -14.568  | .000  | .780                    | 1.283 |
| <i>ABCG5</i> rs119480069  | .000                        | .003       | .000                      | -.125    | .901  | 1.000                   | 1.000 |
| <i>ABCG5</i> rs199984328  | -.003                       | .004       | -.003                     | -.705    | .481  | .319                    | 3.133 |
| <i>ABCG5</i> rs560839317  | -.012                       | .005       | -.006                     | -2.216   | .027  | 1.000                   | 1.000 |
| <i>ABCG5</i> rs748096191  | .001                        | .008       | .000                      | .108     | .914  | 1.000                   | 1.000 |
| <i>ABCG5</i> rs75832441   | .000                        | .003       | .001                      | .142     | .887  | .319                    | 3.133 |

**Table S5.** Subgroup analysis between rs11887534 and gallstone disease history: age and sex categories

| Gallstone disease history (%) | GG           | GC          | CC         | <i>p1</i> value       | Beta   | SE     | <i>p2</i> value       | interaction <i>P</i> |
|-------------------------------|--------------|-------------|------------|-----------------------|--------|--------|-----------------------|----------------------|
| Male                          | 4.70% (1939) | 6.98% (84)  | 20.00% (2) | $9.80 \times 10^{-5}$ | 0.4435 | 0.1126 | $8.10 \times 10^{-5}$ | 0.3960               |
| Female                        | 4.38% (3194) | 6.01% (139) | 4.76% (1)  | 0.0009                | 0.3088 | 0.0883 | 0.0005                |                      |
| Young age (< 50 y/o)          | 2.72% (1470) | 3.85% (62)  | 11.11% (1) | 0.0076                | 0.3767 | 0.1301 | 0.0038                | 0.8474               |
| Old age ( $\geq$ 50 y/o)      | 6.10% (3663) | 8.46% (161) | 9.09% (2)  | 0.0001                | 0.3536 | 0.0821 | $1.60 \times 10^{-5}$ |                      |

Data presented as percentage (number).

*p1* value: unadjusted; *p2* value for male and female: adjusted for age, BMI, and current smoking. *p2* value for young and old age: adjusted for sex, BMI, and current smoking.



**Table S6.** Genotype-phenotype association analysis of *ABCG5* and *ABCG8* lead single nucleotide variants for lipid profile and gallstone disease history

| Genetic variants                         | Genotypes             |                       |                       | <i>p</i> 1 value*     | Beta    | SE     | <i>p</i> 2 value*     |
|------------------------------------------|-----------------------|-----------------------|-----------------------|-----------------------|---------|--------|-----------------------|
| <i>PLEKHH2</i> rs75832441 (117,601)      | GG (115,206)          | GA (2384)             | AA (11)               |                       |         |        |                       |
| Total cholesterol# (mg/dL)               | 193.0 (171.0 - 217.0) | 198.0 (174.0 - 223.0) | 197.0 (186.3 - 20830) | $3.41 \times 10^{-7}$ | 0.0093  | 0.0016 | $1.20 \times 10^{-8}$ |
| LDL cholesterol# (mg/dL)                 | 119.0 (99.0 - 140.0)  | 123.0 (103.0 - 146.0) | 130.5 (107.8 - 134.0) | $3.67 \times 10^{-7}$ | 0.0137  | 0.0024 | $2.20 \times 10^{-8}$ |
| Non-HDL cholesterol# (mg/dL)             | 138.0 (116.0 - 162.0) | 142.0 (119.0 - 167.0) | 147.5 (131.8 - 165.3) | $1.34 \times 10^{-7}$ | 0.0132  | 0.0022 | $2.30 \times 10^{-9}$ |
| HDL cholesterol# (mg/dL)                 | 53.0 (45.0 - 63.0)    | 53.0 (45.0 - 63.0)    | 51.0 (41.8 - 59.0)    | 0.7663                | -0.0008 | 0.0020 | 0.6819                |
| Triglyceride# (mg/dL)                    | 91.0 (64.0 - 133.0)   | 92.0 (63.0 - 137.0)   | 98.5 (66.3 - 148.0)   | 0.3389                | 0.0083  | 0.0046 | 0.0704                |
| Remnant cholesterol# (mg/dL)             | 19.0 (14.0 - 26.0)    | 16.0 (11.0 - 23.0)    | 19.5 (14.5 - 31.3)    | 0.0788                | 0.0127  | 0.0056 | 0.0229                |
| Gallstone disease (%)                    | 4.57% (5259)          | 4.07% (97)            | 18.18% (2)            | 0.0493                | -0.0845 | 0.1027 | 0.4107                |
| Family history of gallstone disease (%)  | 7.54% (8692)          | 7.17% (171)           | 0.00% (0)             | 0.5065                | -0.0619 | 0.0798 | 0.4381                |
| <i>ABCG5-ABCG8</i> rs115445558 (117,578) | GG (114,014)          | GC (3532)             | CC (32)               |                       |         |        |                       |
| Total cholesterol# (mg/dL)               | 193.0 (171.0 - 217.0) | 193.0 (170.0 - 217.0) | 206.5 (191.5 - 229.3) | 0.2245                | -0.0007 | 0.0013 | 0.5970                |
| LDL cholesterol# (mg/dL)                 | 119.0 (99.0 - 141.0)  | 119.0 (99.0 - 141.0)  | 129.5 (110.0 - 145.3) | 0.3121                | -0.0016 | 0.0020 | 0.4351                |
| Non-HDL cholesterol# (mg/dL)             | 138.0 (116.0 - 162.0) | 137.0 (115.0 - 161.0) | 151.0 (137.5 - 171.3) | 0.0996                | -0.0009 | 0.0018 | 0.5977                |
| HDL cholesterol# (mg/dL)                 | 53.0 (45.0 - 63.0)    | 54.0 (45.0 - 63.0)    | 54.0 (45.8 - 62.0)    | 0.6031                | -0.0002 | 0.0016 | 0.9093                |
| Triglyceride# (mg/dL)                    | 91.0 (64.0 - 133.0)   | 90.0 (63.0 - 133.0)   | 99.0 (76.8 - 166.0)   | 0.2170                | 0.0025  | 0.0037 | 0.5039                |
| Remnant cholesterol# (mg/dL)             | 16.0 (11.0 - 23.0)    | 16.0 (12.0 - 23.0)    | 21.0 (13.0 - 34.0)    | 0.0756                | 0.0038  | 0.0045 | 0.4059                |
| Gallstone disease (%)                    | 4.50% (5126)          | 6.37% (225)           | 9.38% (3)             | $4.12 \times 10^{-7}$ | 0.3666  | 0.0691 | $1.14 \times 10^{-7}$ |
| Family history of gallstone disease (%)  | 7.50% (8549)          | 8.78% (310)           | 9.38% (3)             | 0.0166                | 0.1685  | 0.0594 | 0.0045                |

Data presented as median (interquartile range).

Abbreviation as in Table 1.

Number of the participants shown in brackets after the genotypes.

# Participants were analyzed after the exclusion of those with a history of hyperlipidemia.

\**p*1 value: unadjusted; *p*2 value: adjusted for age, sex, BMI, and current smoking.

**Table S7. Baseline characteristics of Taiwan Biobank participants**

| Clinical and laboratory parameters           | Participants with GWAS data (n = 117,679) |
|----------------------------------------------|-------------------------------------------|
| Blood Pressure                               |                                           |
| Systolic BP <sup>†</sup> (mmHg)              | 115.5 (105.3 - 127.0)                     |
| Diastolic BP <sup>†</sup> (mmHg)             | 71.0 (65.0 - 79.0)                        |
| Mean BP <sup>†</sup> (mmHg)                  | 86.2 (78.8 - 94.6)                        |
| Glucose metabolism                           |                                           |
| Fasting plasma glucose <sup>††</sup> (mg/dL) | 92.0 (87.0 - 97.0)                        |
| HbA1C <sup>††</sup> (%)                      | 5.6 (5.4 - 5.8)                           |
| Insulin resistance surrogate markers         |                                           |
| TyG index <sup>#, ††</sup>                   | 8277.0 (5696.0 - 12500.0)                 |
| TyG-BMI <sup>#, ††</sup> ( $\times 10^3$ )   | 197.29 (127.32 - 316.91)                  |
| TyG-WC <sup>#, ††</sup> ( $\times 10^3$ )    | 683.52 (444.73 - 1080.97)                 |
| Uric acid                                    |                                           |
| Uric acid <sup>†††</sup> (mg/dL)             | 5.2 (4.4 - 6.2)                           |
| Renal function                               |                                           |
| Creatinine (mg/dL)                           | 0.68 (0.58 - 0.84)                        |
| eGFR (mL/min/1.73 m <sup>2</sup> )           | 100.16 (86.88 - 115.56)                   |
| Albuminuria (mg/L)                           | 8.7 (5.3 - 15.2)                          |
| Liver function                               |                                           |
| AST (U/L)                                    | 23.0 (20.0 - 27.0)                        |
| ALT (U/L)                                    | 19.0 (14.0 - 27.0)                        |
| $\gamma$ GT (U/L)                            | 17.0 (12.0 - 26.0)                        |
| Serum albumin (g/dL)                         | 4.5 (4.4 - 4.7)                           |
| Total bilirubin (mg/dL)                      | 0.6 (0.5 - 0.8)                           |
| Hematological parameters                     |                                           |
| Leukocyte count ( $10^3/\mu\text{L}$ )       | 5.6 (4.7 - 6.7)                           |
| Hematocrit (%)                               | 41.5 (38.9 - 44.5)                        |
| Platelet count ( $10^3/\mu\text{L}$ )        | 238.0 (202.0 - 277.0)                     |
| Red blood cell count ( $10^6/\mu\text{L}$ )  | 4.7 (4.4 - 5.1)                           |
| Hemoglobin (g/dL)                            | 13.7 (12.8 - 14.8)                        |
| Atherosclerotic risk factors                 |                                           |
| Diabetes mellitus (%)                        | 9.47% (11142)                             |
| Hypertension (%)                             | 22.27% (26212)                            |
| Current smoking (%)                          | 19.67% (23,148)                           |
| Gout (%)                                     | 3.86% (4548)                              |
| Microalbuminuria (%)                         | 11.19% (13141)                            |
| Metabolic syndrome (%)                       | 25.52% (30,035)                           |

GWAS: genome-wide association study, BP: blood pressure, HbA1C: hemoglobin A1C, TyG: triglyceride glucose, BMI: body mass index, WC: waist circumference, eGFR: estimated glomerular filtration rate, AST: aspartate aminotransferase, ALT: alanine aminotransferase,  $\gamma$ GT:  $\gamma$ -Glutamyl transferase.

Participants were analyzed after the exclusion of those with a history of <sup>†</sup>hypertension, <sup>††</sup>diabetes mellitus, <sup>†††</sup>gout, and <sup>#</sup>hyperlipidemia.

Level was presented as median (interquartile range) or percentage (number).

**Figure S1.** Regional association analysis of *ABCG5* and *ABCG8* loci variants and lipid profile

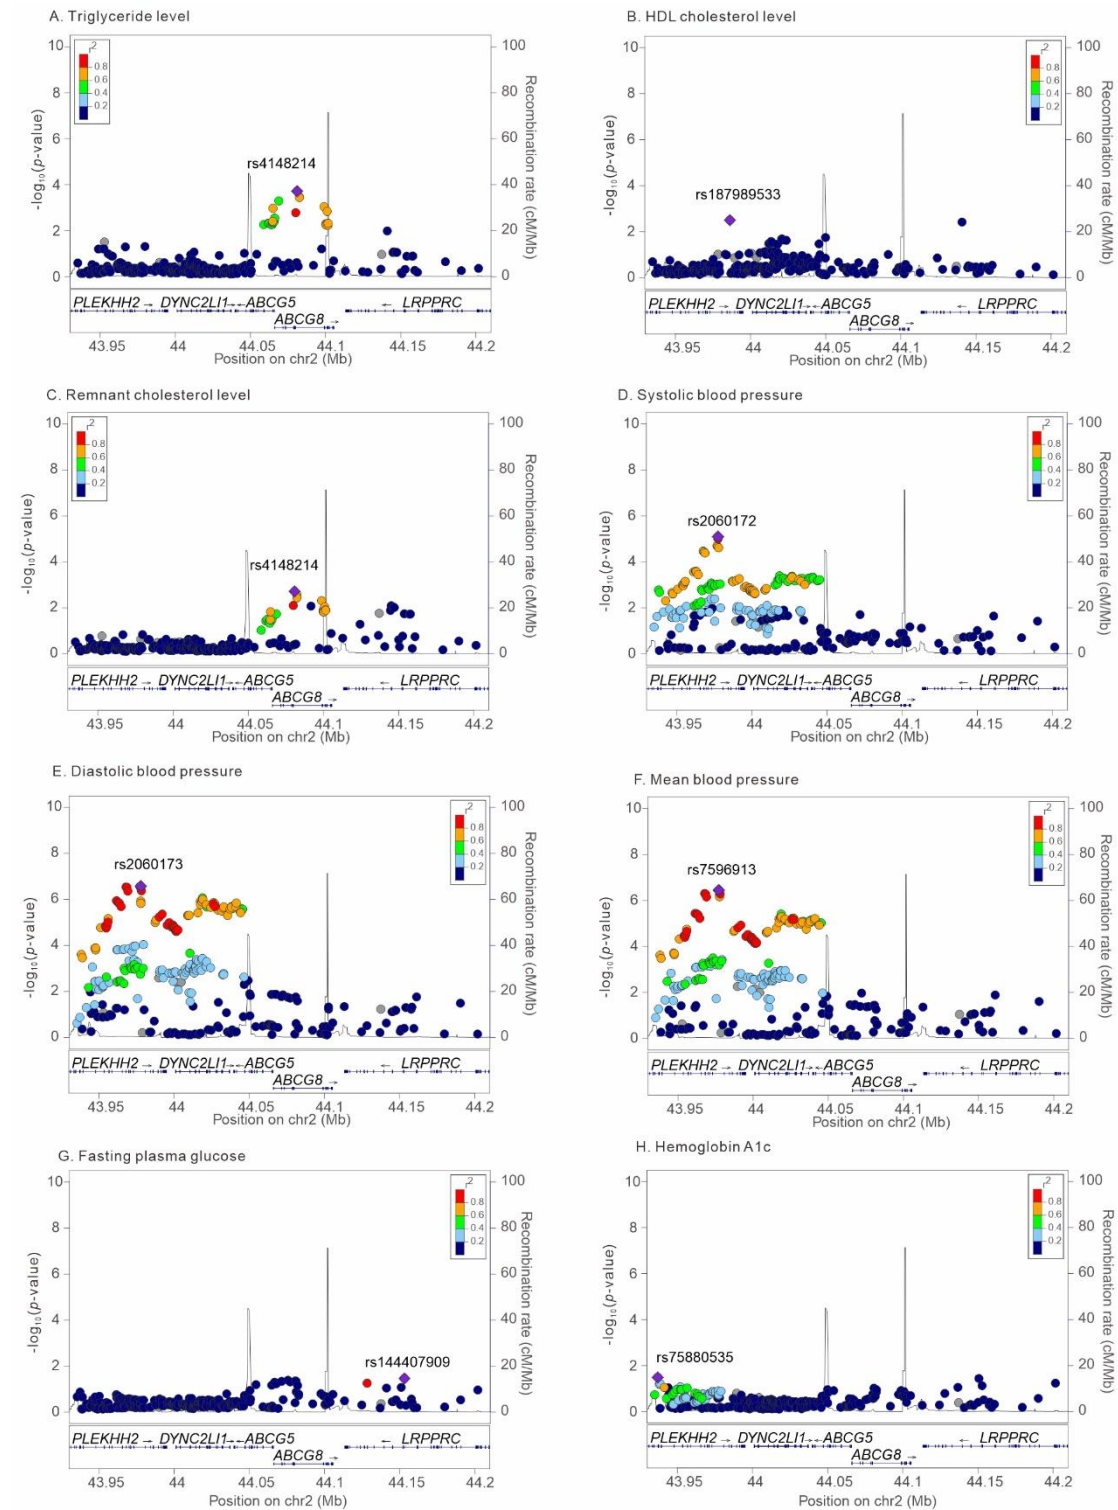

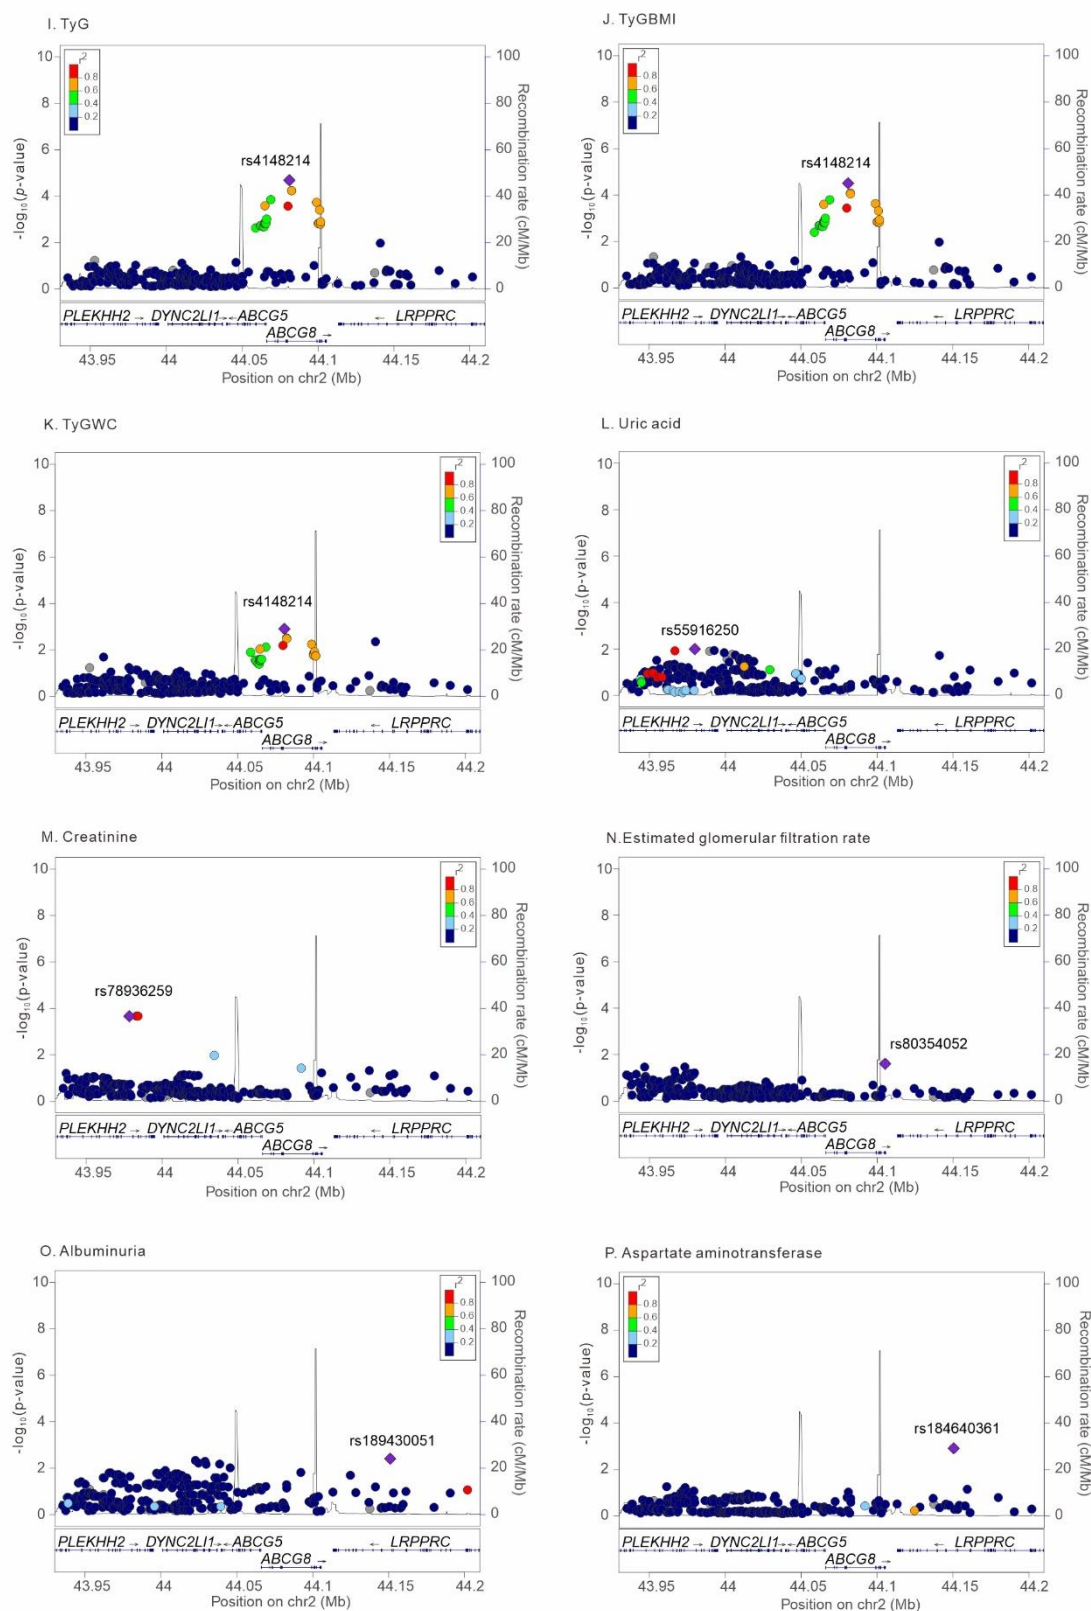

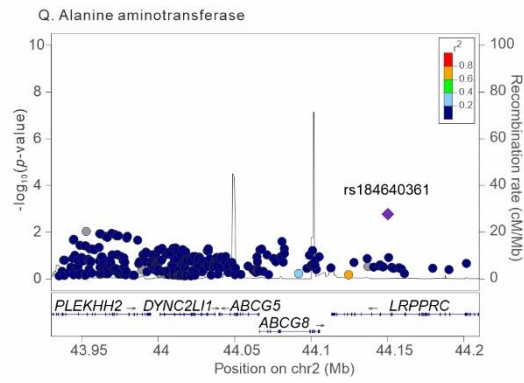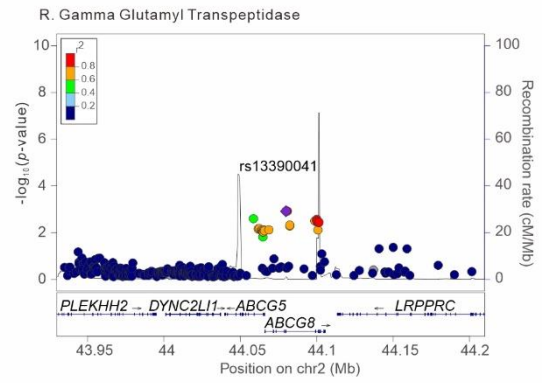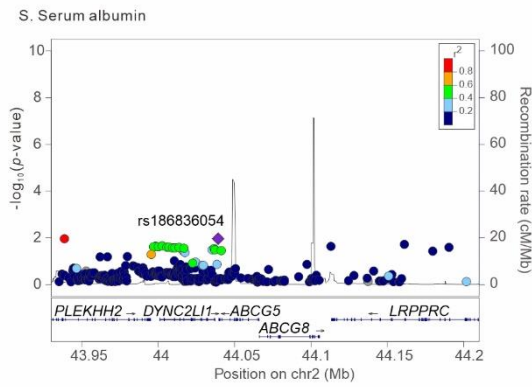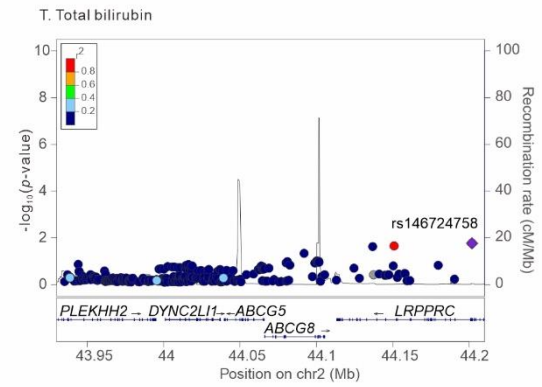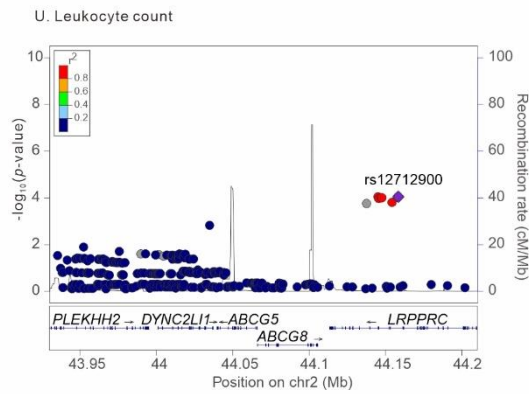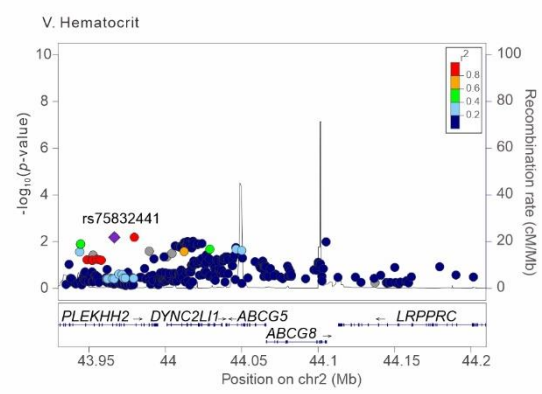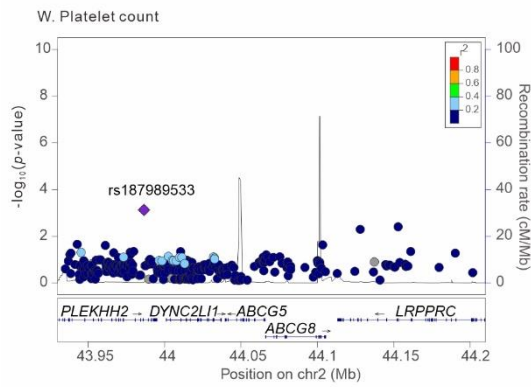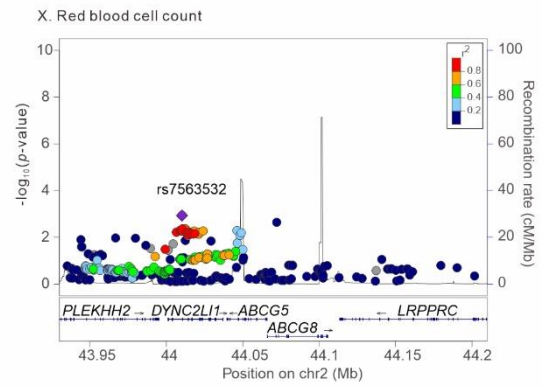

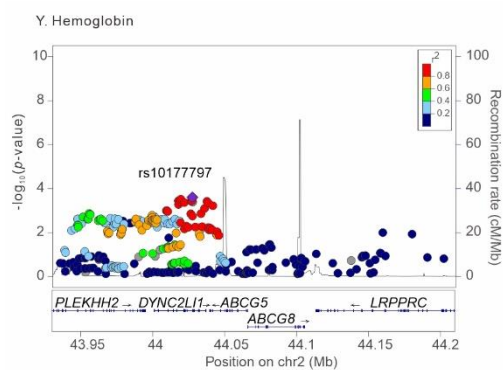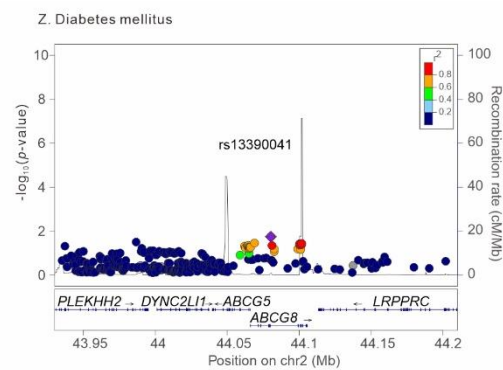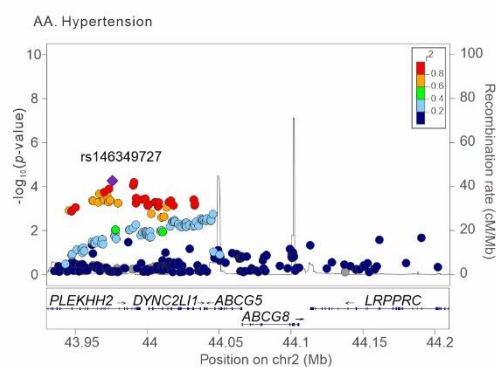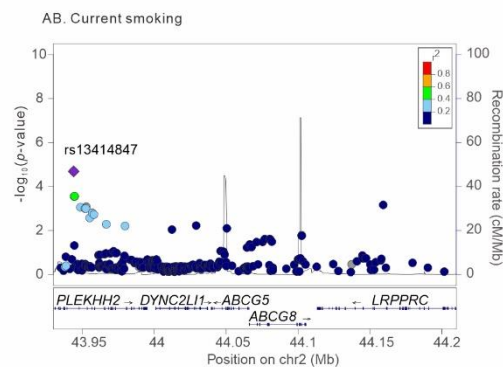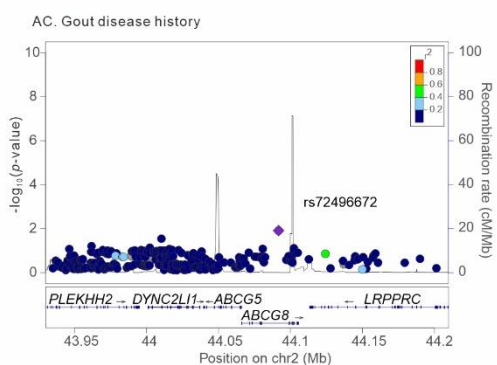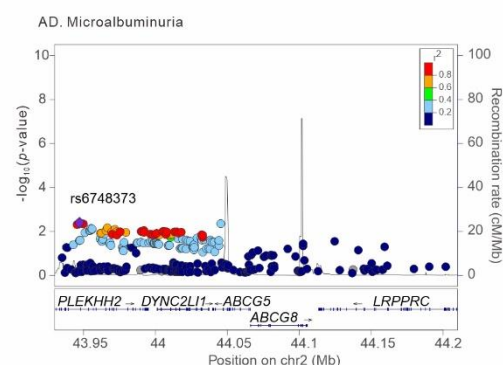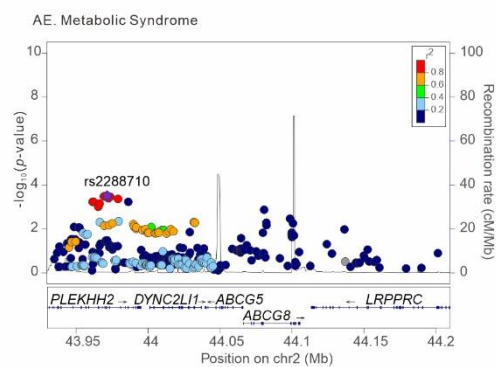



**Table S8.** Association between *ABCG5* rs560839317 genotypes and clinical and laboratory parameters in Taiwan Biobank participants

| Clinical and laboratory parameters   |                                               | beta      | SE       | <i>p</i> value          |
|--------------------------------------|-----------------------------------------------|-----------|----------|-------------------------|
| Anthropology                         |                                               |           |          |                         |
|                                      | Age (years)                                   | -0.1144   | 0.6186   | 0.8533                  |
|                                      | Waist circumference (cm)                      | 0.0845    | 0.2873   | 0.7685                  |
|                                      | Waist-hip ratio                               | 0.0021    | 0.0030   | 0.4821                  |
|                                      | Body mass index (kg/m <sup>2</sup> )          | 0.0095    | 0.2099   | 0.9641                  |
| Blood Pressure                       |                                               |           |          |                         |
|                                      | Systolic BP <sup>†</sup> (mmHg)               | 0.5365    | 0.8705   | 0.5377                  |
|                                      | Diastolic BP <sup>†</sup> (mmHg)              | 0.2468    | 0.5695   | 0.6648                  |
|                                      | Mean BP <sup>†</sup> (mmHg)                   | 0.3435    | 0.6258   | 0.5831                  |
| Lipid profiles                       |                                               |           |          |                         |
|                                      | Total cholesterol# (mg/dL)                    | 0.0222    | 0.0046   | 1.43 × 10 <sup>-6</sup> |
|                                      | HDL-cholesterol# (mg/dL)                      | -0.0081   | 0.0055   | 0.1376                  |
|                                      | LDL-cholesterol# (mg/dL)                      | 0.0339    | 0.0069   | 8.59 × 10 <sup>-7</sup> |
|                                      | Triglyceride# (mg/dL)                         | 0.0344    | 0.0128   | 0.0073                  |
|                                      | Non-HDL-cholesterol# (mg/dL)                  | 0.0335    | 0.0062   | 6.97 × 10 <sup>-8</sup> |
|                                      | Remnant cholesterol# (mg/dL)                  | 0.0197    | 0.0156   | 0.2067                  |
| Glucose metabolism                   |                                               |           |          |                         |
|                                      | Fasting plasma glucose <sup>††</sup> (mg/dL)  | 1.2984    | 0.8484   | 0.1259                  |
|                                      | HbA1c <sup>††</sup> (%)                       | 0.0560    | 0.0338   | 0.0978                  |
| Insulin resistance surrogate markers |                                               |           |          |                         |
|                                      | TyG index <sup>#, ††</sup>                    | 1650.0897 | 585.3530 | 0.0048                  |
|                                      | TyG-BMI <sup>#, ††</sup> (× 10 <sup>3</sup> ) | 43.91035  | 15.4786  | 0.0046                  |
|                                      | TyG-WC <sup>#, ††</sup> (× 10 <sup>3</sup> )  | 148.0184  | 53.3335  | 0.0055                  |
| Uric acid                            |                                               |           |          |                         |
|                                      | Uric acid <sup>†††</sup> (mg/dL)              | 0.0663    | 0.0631   | 0.2930                  |
| Renal function                       |                                               |           |          |                         |
|                                      | Creatinine (mg/dL)                            | -0.0145   | 0.0156   | 0.3508                  |
|                                      | eGFR (mL/min/1.73 m <sup>2</sup> )            | 1.9791    | 1.2241   | 0.1059                  |
|                                      | Albuminuria (mg/L)                            | -0.0244   | 0.0259   | 0.3458                  |
| Liver function                       |                                               |           |          |                         |
|                                      | AST (U/L)                                     | 0.3534    | 0.6863   | 0.6066                  |
|                                      | ALT (U/L)                                     | 1.3298    | 1.1193   | 0.2348                  |
|                                      | γGT (U/L)                                     | 5.9924    | 1.7961   | 0.0008                  |
|                                      | Serum albumin (g/dL)                          | -0.0142   | 0.0127   | 0.2609                  |
|                                      | Total bilirubin (mg/dL)                       | -0.0377   | 0.0154   | 0.0145                  |
| Hematological parameters             |                                               |           |          |                         |
|                                      | Leukocyte count (10 <sup>3</sup> /μL)         | -0.1391   | 1.6657   | 0.9335                  |
|                                      | Hematocrit (%)                                | 0.1297    | 0.1947   | 0.5053                  |
|                                      | Platelet count (10 <sup>3</sup> /μL)          | 2.2186    | 3.2985   | 0.5012                  |
|                                      | Red blood cell count (10 <sup>6</sup> /μL)    | 0.0092    | 0.0255   | 0.7169                  |
|                                      | Hemoglobin (g/dL)                             | 0.0205    | 0.0705   | 0.7707                  |
| Atherosclerotic risk factors         |                                               |           |          |                         |
|                                      | Gallstone (%)                                 | -0.0948   | 0.2853   | 0.7398                  |
|                                      | Diabetes mellitus (%)                         | 0.4211    | 0.1786   | 0.0184                  |
|                                      | Hypertension (%)                              | 0.1559    | 0.1468   | 0.2883                  |
|                                      | Current smoking (%)                           | 0.0841    | 0.1588   | 0.5961                  |
|                                      | Gout (%)                                      | 0.1503    | 0.2953   | 0.6108                  |
|                                      | Microalbuminuria (%)                          | -0.1426   | 0.1923   | 0.4584                  |
|                                      | Metabolic syndrome (%)                        | 0.3321    | 0.1432   | 0.0204                  |

*p* value: adjusted for age, sex, BMI, and current smoking; age: adjusted for sex, BMI and current smoking; BMI: adjusted for age, sex and smoking; current smoking: adjusted for age, sex and BMI.

Participant recruitment for analysis is shown in Figure 1 and Supplementary Table 6.

Abbreviation as in Table 1 and Supplementary Table 6.

**Table S9.** Association of the *ABCG5* rs6720173 genotype with metabolic and hematological phenotypes

| Clinical and laboratory parameters            | beta     | SE      | p value |
|-----------------------------------------------|----------|---------|---------|
| Anthropology                                  |          |         |         |
| Age (years)                                   | 0.1369   | 0.0731  | 0.0610  |
| Waist circumference (cm)                      | -0.0451  | 0.0339  | 0.1844  |
| Waist-hip ratio                               | -0.0002  | 0.0004  | 0.5757  |
| Body mass index (kg/m <sup>2</sup> )          | -0.0295  | 0.0248  | 0.2339  |
| Blood Pressure                                |          |         |         |
| Systolic BP <sup>†</sup> (mmHg)               | 0.2319   | 0.1022  | 0.0233  |
| Diastolic BP <sup>†</sup> (mmHg)              | 0.2242   | 0.0669  | 0.0008  |
| Mean BP <sup>†</sup> (mmHg)                   | 0.2268   | 0.0735  | 0.0020  |
| Lipid profiles                                |          |         |         |
| Total cholesterol# (mg/dL)                    | 0.0016   | 0.0005  | 0.0024  |
| HDL-cholesterol# (mg/dL)                      | 0.0014   | 0.0006  | 0.0272  |
| LDL-cholesterol# (mg/dL)                      | 0.0016   | 0.0008  | 0.0456  |
| Triglyceride# (mg/dL)                         | 0.0014   | 0.0015  | 0.3462  |
| Non-HDL-cholesterol# (mg/dL)                  | 0.0015   | 0.0007  | 0.0292  |
| Remnant cholesterol# (mg/dL)                  | 0.0007   | 0.0018  | 0.7090  |
| Glucose metabolism                            |          |         |         |
| Fasting plasma glucose <sup>††</sup> (mg/dL)  | -0.0056  | 0.1001  | 0.9556  |
| HbA1c <sup>††</sup> (%)                       | -0.0044  | 0.0040  | 0.2712  |
| Insulin resistance surrogate markers          |          |         |         |
| TyG index <sup>#, ††</sup>                    | 101.4381 | 67.2792 | 0.1316  |
| TyG-BMI <sup>#, ††</sup> (× 10 <sup>3</sup> ) | 3.05413  | 1.7792  | 0.0861  |
| TyG-WC <sup>#, ††</sup> (× 10 <sup>3</sup> )  | 10.4686  | 6.1230  | 0.0877  |
| Uric acid                                     |          |         |         |
| Uric acid <sup>†††</sup> (mg/dL)              | 0.0124   | 0.0074  | 0.0962  |
| Renal function                                |          |         |         |
| Creatinine (mg/dL)                            | -0.0003  | 0.0018  | 0.8685  |
| eGFR (mL/min/1.73 m <sup>2</sup> )            | 0.0699   | 0.1447  | 0.6290  |
| Albuminuria (mg/L)                            | -0.0054  | 0.0031  | 0.0793  |
| Liver function                                |          |         |         |
| AST (U/L)                                     | -0.0952  | 0.0812  | 0.2410  |
| ALT (U/L)                                     | -0.0101  | 0.1324  | 0.9393  |
| γGT (U/L)                                     | 0.1275   | 0.2130  | 0.5494  |
| Serum albumin (g/dL)                          | 0.0001   | 0.0015  | 0.9617  |
| Total bilirubin (mg/dL)                       | -0.0027  | 0.0018  | 0.1369  |
| Hematological parameters                      |          |         |         |
| Leukocyte count (10 <sup>3</sup> /μL)         | 0.3595   | 0.1968  | 0.0678  |
| Hematocrit (%)                                | 0.0547   | 0.0230  | 0.0174  |
| Platelet count (10 <sup>3</sup> /μL)          | 0.2002   | 0.3897  | 0.6075  |
| Red blood cell count (10 <sup>6</sup> /μL)    | 0.0072   | 0.0030  | 0.0171  |
| Hemoglobin (g/dL)                             | 0.0158   | 0.0083  | 0.0574  |
| Atherosclerotic risk factors                  |          |         |         |
| Gallstone (%)                                 | 0.0389   | 0.0318  | 0.2218  |
| Diabetes mellitus (%)                         | -0.0043  | 0.0241  | 0.8570  |
| Hypertension (%)                              | 0.0158   | 0.0179  | 0.3770  |
| Current smoking (%)                           | -0.0064  | 0.0192  | 0.7375  |
| Gout (%)                                      | 0.0216   | 0.0361  | 0.5489  |
| Microalbuminuria (%)                          | -0.0141  | 0.0217  | 0.5172  |
| Metabolic syndrome (%)                        | -0.0187  | 0.0178  | 0.2942  |

Adjustment condition, participant recruitment and abbreviation as in Supplementary Table 8.



**Table S10.** Association between *ABCG5* rs199984328 genotypes and clinical and laboratory parameters in Taiwan Biobank participants

| Clinical and laboratory parameters   |                                              | beta     | SE       | P value*               |
|--------------------------------------|----------------------------------------------|----------|----------|------------------------|
| Anthropology                         |                                              |          |          |                        |
|                                      | Age (years)                                  | -0.0674  | 0.2700   | 0.8029                 |
|                                      | Waist circumference (cm)                     | -0.0086  | 0.1253   | 0.9453                 |
|                                      | Waist-hip ratio                              | -0.0005  | 0.0013   | 0.7182                 |
|                                      | Body mass index (kg/m <sup>2</sup> )         | -0.0557  | 0.0916   | 0.5427                 |
| Blood Pressure                       |                                              |          |          |                        |
|                                      | Systolic BP <sup>†</sup> (mmHg)              | 0.1401   | 0.3783   | 0.7112                 |
|                                      | Diastolic BP <sup>†</sup> (mmHg)             | 0.5132   | 0.2474   | 0.0381                 |
|                                      | Mean BP <sup>†</sup> (mmHg)                  | 0.3889   | 0.2719   | 0.1527                 |
| Lipid profiles                       |                                              |          |          |                        |
|                                      | Total cholesterol# (mg/dL)                   | 0.0116   | 0.0020   | $4.92 \times 10^{-9}$  |
|                                      | HDL-cholesterol# (mg/dL)                     | -0.0020  | 0.0024   | 0.4072                 |
|                                      | LDL-cholesterol# (mg/dL)                     | 0.0186   | 0.0030   | $3.35 \times 10^{-10}$ |
|                                      | Triglyceride# (mg/dL)                        | 0.0102   | 0.0055   | 0.0655                 |
|                                      | Non-HDL-cholesterol# (mg/dL)                 | 0.0171   | 0.0027   | $1.71 \times 10^{-10}$ |
|                                      | Remnant cholesterol# (mg/dL)                 | 0.0090   | 0.0068   | 0.1839                 |
| Glucose metabolism                   |                                              |          |          |                        |
|                                      | Fasting plasma glucose <sup>††</sup> (mg/dL) | 0.4676   | 0.3695   | 0.2057                 |
|                                      | HbA1c <sup>††</sup> (%)                      | 0.0173   | 0.0147   | 0.2396                 |
| Insulin resistance surrogate markers |                                              |          |          |                        |
|                                      | TyG index <sup>#, ††</sup>                   | 584.3825 | 250.1208 | 0.0195                 |
|                                      | TyG-BMI <sup>#, ††</sup> ( $\times 10^3$ )   | 15.5297  | 6.61444  | 0.0189                 |
|                                      | TyG-WC <sup>#, ††</sup> ( $\times 10^3$ )    | 54.1620  | 22.7899  | 0.0175                 |
| Uric acid                            |                                              |          |          |                        |
|                                      | Uric acid <sup>†††</sup> (mg/dL)             | 0.0318   | 0.0275   | 0.2476                 |
| Renal function                       |                                              |          |          |                        |
|                                      | Creatinine (mg/dL)                           | 0.0118   | 0.0068   | 0.0822                 |
|                                      | eGFR (mL/min/1.73 m <sup>2</sup> )           | -0.4869  | 0.5346   | 0.3624                 |
|                                      | Albuminuria (mg/L)                           | -0.0116  | 0.0113   | 0.3072                 |
| Liver function                       |                                              |          |          |                        |
|                                      | AST (U/L)                                    | 0.3702   | 0.2998   | 0.2168                 |
|                                      | ALT (U/L)                                    | 1.0852   | 0.4896   | 0.0267                 |
|                                      | $\gamma$ GT (U/L)                            | -0.0755  | 0.7875   | 0.9236                 |
|                                      | Serum albumin (g/dL)                         | -0.0067  | 0.0055   | 0.2279                 |
|                                      | Total bilirubin (mg/dL)                      | -0.0064  | 0.0067   | 0.3412                 |
| Hematological parameters             |                                              |          |          |                        |
|                                      | Leukocyte count ( $10^3/\mu\text{L}$ )       | -0.0006  | 0.7271   | 0.9994                 |
|                                      | Hematocrit (%)                               | 0.1174   | 0.0850   | 0.1673                 |
|                                      | Platelet count ( $10^3/\mu\text{L}$ )        | 0.1415   | 1.4398   | 0.9217                 |
|                                      | Red blood cell count ( $10^6/\mu\text{L}$ )  | 0.0199   | 0.0111   | 0.0738                 |
|                                      | Hemoglobin (g/dL)                            | 0.0106   | 0.0308   | 0.7299                 |
| Atherosclerotic risk factors         |                                              |          |          |                        |
|                                      | Gallstone (%)                                | -0.1375  | 0.1274   | 0.2805                 |
|                                      | Diabetes mellitus (%)                        | -0.0025  | 0.0896   | 0.9774                 |
|                                      | Hypertension (%)                             | 0.0697   | 0.0657   | 0.2886                 |
|                                      | Current smoking (%)                          | -0.1778  | 0.0729   | 0.0147                 |
|                                      | Gout (%)                                     | 0.0603   | 0.1312   | 0.6460                 |
|                                      | Microalbuminuria (%)                         | -0.0457  | 0.0815   | 0.5748                 |
|                                      | Metabolic syndrome (%)                       | 0.1970   | 0.0639   | 0.0021                 |

Adjustment condition, participant recruitment and abbreviation as in Supplementary Table 8.

**Table S11.** Association between *ABCG5* rs119480069 genotypes and clinical and laboratory parameters in Taiwan Biobank participants

| Clinical and laboratory parameters   |                                               | beta     | SE       | P value*                 |
|--------------------------------------|-----------------------------------------------|----------|----------|--------------------------|
| Anthropology                         |                                               |          |          |                          |
|                                      | Age (years)                                   | -0.3881  | 0.4074   | 0.3407                   |
|                                      | Waist circumference (cm)                      | 0.0268   | 0.1892   | 0.8872                   |
|                                      | Waist-hip ratio                               | 0.0054   | 0.0020   | 0.0056                   |
|                                      | Body mass index (kg/m <sup>2</sup> )          | -0.0359  | 0.1382   | 0.7947                   |
| Blood Pressure                       |                                               |          |          |                          |
|                                      | Systolic BP <sup>†</sup> (mmHg)               | 0.6773   | 0.5677   | 0.2329                   |
|                                      | Diastolic BP <sup>†</sup> (mmHg)              | 0.1378   | 0.3713   | 0.7106                   |
|                                      | Mean BP <sup>†</sup> (mmHg)                   | 0.3176   | 0.4081   | 0.4364                   |
| Lipid profiles                       |                                               |          |          |                          |
|                                      | Total cholesterol# (mg/dL)                    | 0.0261   | 0.0030   | 5.02 × 10 <sup>-18</sup> |
|                                      | HDL-cholesterol# (mg/dL)                      | -0.0025  | 0.0036   | 0.4899                   |
|                                      | LDL-cholesterol# (mg/dL)                      | 0.0398   | 0.0045   | 9.72 × 10 <sup>-19</sup> |
|                                      | Triglyceride# (mg/dL)                         | 0.0137   | 0.0084   | 0.1033                   |
|                                      | Non-HDL-cholesterol# (mg/dL)                  | 0.0375   | 0.0041   | 3.22 × 10 <sup>-20</sup> |
|                                      | Remnant cholesterol# (mg/dL)                  | 0.0227   | 0.0103   | 0.0272                   |
| Glucose metabolism                   |                                               |          |          |                          |
|                                      | Fasting plasma glucose <sup>††</sup> (mg/dL)  | 0.1152   | 0.5613   | 0.8374                   |
|                                      | HbA1c <sup>††</sup> (%)                       | -0.0022  | 0.0224   | 0.9219                   |
| Insulin resistance surrogate markers |                                               |          |          |                          |
|                                      | TyG index <sup>#, ††</sup>                    | 233.2743 | 382.5686 | 0.5420                   |
|                                      | TyG-BMI <sup>#, ††</sup> (× 10 <sup>3</sup> ) | 9.8945   | 10.1163  | 0.3280                   |
|                                      | TyG-WC <sup>#, ††</sup> (× 10 <sup>3</sup> )  | 25.6732  | 34.8567  | 0.4614                   |
| Uric acid                            |                                               |          |          |                          |
|                                      | Uric acid <sup>†††</sup> (mg/dL)              | 0.0904   | 0.0417   | 0.0303                   |
| Renal function                       |                                               |          |          |                          |
|                                      | Creatinine (mg/dL)                            | -0.0057  | 0.0103   | 0.5779                   |
|                                      | eGFR (mL/min/1.73 m <sup>2</sup> )            | -0.3193  | 0.8062   | 0.6921                   |
|                                      | Albuminuria (mg/L)                            | 0.0013   | 0.0171   | 0.9373                   |
| Liver function                       |                                               |          |          |                          |
|                                      | AST (U/L)                                     | 1.3172   | 0.4517   | 0.0035                   |
|                                      | ALT (U/L)                                     | 1.5330   | 0.7377   | 0.0377                   |
|                                      | γGT (U/L)                                     | 2.4041   | 1.1876   | 0.0429                   |
|                                      | Serum albumin (g/dL)                          | -0.0131  | 0.0083   | 0.1164                   |
|                                      | Total bilirubin (mg/dL)                       | -0.0025  | 0.0101   | 0.8088                   |
| Hematological parameters             |                                               |          |          |                          |
|                                      | Leukocyte count (10 <sup>3</sup> /μL)         | -0.0356  | 1.0957   | 0.9741                   |
|                                      | Hematocrit (%)                                | 0.3565   | 0.1282   | 0.0054                   |
|                                      | Platelet count (10 <sup>3</sup> /μL)          | 1.4942   | 2.1723   | 0.4916                   |
|                                      | Red blood cell count (10 <sup>6</sup> /μL)    | -0.0063  | 0.0168   | 0.7082                   |
|                                      | Hemoglobin (g/dL)                             | 0.1250   | 0.0464   | 0.0070                   |
| Atherosclerotic risk factors         |                                               |          |          |                          |
|                                      | Gallstone (%)                                 | -0.1560  | 0.1941   | 0.4215                   |
|                                      | Diabetes mellitus (%)                         | 0.0864   | 0.1309   | 0.5093                   |
|                                      | Hypertension (%)                              | -0.0392  | 0.1014   | 0.6987                   |
|                                      | Current smoking (%)                           | 0.1879   | 0.1024   | 0.0665                   |
|                                      | Gout (%)                                      | 0.2635   | 0.1795   | 0.1421                   |
|                                      | Microalbuminuria (%)                          | -0.0528  | 0.1225   | 0.6662                   |
|                                      | Metabolic syndrome (%)                        | 0.2108   | 0.0967   | 0.0292                   |

Adjustment condition, participant recruitment and abbreviation as in Supplementary Table 8.

**Table S12.** Association between *ABCG8* rs11887534 genotypes and clinical and laboratory parameters in Taiwan Biobank participants

| Clinical and laboratory parameters   |                                               | beta     | SE       | P value*                |
|--------------------------------------|-----------------------------------------------|----------|----------|-------------------------|
| Anthropology                         |                                               |          |          |                         |
|                                      | Age (years)                                   | 0.3301   | 0.1837   | 0.0724                  |
|                                      | Waist circumference (cm)                      | 0.0284   | 0.0853   | 0.7393                  |
|                                      | Waist-hip ratio                               | -0.0004  | 0.0009   | 0.6858                  |
|                                      | Body mass index (kg/m <sup>2</sup> )          | -0.0124  | 0.0623   | 0.8426                  |
| Blood Pressure                       |                                               |          |          |                         |
|                                      | Systolic BP <sup>†</sup> (mmHg)               | 0.3215   | 0.2562   | 0.2095                  |
|                                      | Diastolic BP <sup>†</sup> (mmHg)              | 0.4000   | 0.1676   | 0.0170                  |
|                                      | Mean BP <sup>†</sup> (mmHg)                   | 0.3738   | 0.1842   | 0.0424                  |
| Lipid profiles                       |                                               |          |          |                         |
|                                      | Total cholesterol# (mg/dL)                    | -0.0008  | 0.0014   | 0.5489                  |
|                                      | HDL-cholesterol# (mg/dL)                      | -0.0003  | 0.0016   | 0.8396                  |
|                                      | LDL-cholesterol# (mg/dL)                      | -0.0023  | 0.0020   | 0.2401                  |
|                                      | Triglyceride# (mg/dL)                         | 0.0036   | 0.0037   | 0.3334                  |
|                                      | Non-HDL-cholesterol# (mg/dL)                  | -0.0015  | 0.0018   | 0.4000                  |
|                                      | Remnant cholesterol# (mg/dL)                  | 0.0045   | 0.0046   | 0.3197                  |
| Glucose metabolism                   |                                               |          |          |                         |
|                                      | Fasting plasma glucose <sup>††</sup> (mg/dL)  | 0.4600   | 0.2511   | 0.0669                  |
|                                      | HbA1c <sup>††</sup> (%)                       | 0.0083   | 0.0100   | 0.4070                  |
| Insulin resistance surrogate markers |                                               |          |          |                         |
|                                      | TyG index <sup>#, ††</sup>                    | 220.3875 | 168.6637 | 0.1913                  |
|                                      | TyG-BMI <sup>#, ††</sup> (× 10 <sup>3</sup> ) | 6.2021   | 4.4600   | 0.1643                  |
|                                      | TyG-WC <sup>#, ††</sup> (× 10 <sup>3</sup> )  | 21.4883  | 15.3673  | 0.1620                  |
| Uric acid                            |                                               |          |          |                         |
|                                      | Uric acid <sup>†††</sup> (mg/dL)              | -0.0059  | 0.0187   | 0.7500                  |
| Renal function                       |                                               |          |          |                         |
|                                      | Creatinine (mg/dL)                            | 0.0041   | 0.0046   | 0.3747                  |
|                                      | eGFR (mL/min/1.73 m <sup>2</sup> )            | -0.0865  | 0.3636   | 0.8120                  |
|                                      | Albuminuria (mg/L)                            | -1.3956  | 3.2741   | 0.6699                  |
| Liver function                       |                                               |          |          |                         |
|                                      | AST (U/L)                                     | 0.1151   | 0.2038   | 0.5721                  |
|                                      | ALT (U/L)                                     | 0.6028   | 0.3327   | 0.0700                  |
|                                      | γGT (U/L)                                     | -0.2668  | 0.5353   | 0.6182                  |
|                                      | Serum albumin (g/dL)                          | 0.0007   | 0.0038   | 0.8487                  |
|                                      | Total bilirubin (mg/dL)                       | -0.0006  | 0.0046   | 0.9034                  |
| Hematological parameters             |                                               |          |          |                         |
|                                      | Leukocyte count (10 <sup>3</sup> /μL)         | -0.0381  | 0.4939   | 0.9385                  |
|                                      | Hematocrit (%)                                | 0.0991   | 0.0578   | 0.0867                  |
|                                      | Platelet count (10 <sup>3</sup> /μL)          | -1.5469  | 0.9795   | 0.1143                  |
|                                      | Red blood cell count (10 <sup>6</sup> /μL)    | 0.0029   | 0.0076   | 0.7006                  |
|                                      | Hemoglobin (g/dL)                             | 0.0393   | 0.0209   | 0.0601                  |
| Atherosclerotic risk factors         |                                               |          |          |                         |
|                                      | Gallstone (%)                                 | 0.3604   | 0.0694   | 2.08 × 10 <sup>-7</sup> |
|                                      | Diabetes mellitus (%)                         | -0.0710  | 0.0618   | 0.2500                  |
|                                      | Hypertension (%)                              | 0.0054   | 0.0450   | 0.9050                  |
|                                      | Current smoking (%)                           | -0.0888  | 0.0494   | 0.0725                  |
|                                      | Gout (%)                                      | -0.1014  | 0.0962   | 0.2917                  |
|                                      | Microalbuminuria (%)                          | 0.0825   | 0.0527   | 0.1172                  |
|                                      | Metabolic syndrome (%)                        | 0.0413   | 0.0443   | 0.3516                  |

Adjustment condition, participant recruitment and abbreviation as in Supplementary Table 8.

**Table S13.** Association between *PLEKHH2* rs7596913 genotypes and clinical and laboratory parameters in Taiwan Biobank participants

| Clinical and laboratory parameters   |                                               | beta    | SE     | P value*                |
|--------------------------------------|-----------------------------------------------|---------|--------|-------------------------|
| Anthropology                         |                                               |         |        |                         |
|                                      | Age (years)                                   | 0.1229  | 0.0568 | 0.0305                  |
|                                      | Waist circumference (cm)                      | -0.0010 | 0.0264 | 0.9703                  |
|                                      | Waist-hip ratio                               | 0.0001  | 0.0003 | 0.6601                  |
|                                      | Body mass index (kg/m <sup>2</sup> )          | -0.0049 | 0.0193 | 0.7993                  |
| Blood Pressure                       |                                               |         |        |                         |
|                                      | Systolic BP <sup>†</sup> (mmHg)               | 0.3347  | 0.0794 | 2.51 × 10 <sup>-5</sup> |
|                                      | Diastolic BP <sup>†</sup> (mmHg)              | 0.2651  | 0.0520 | 3.36 × 10 <sup>-7</sup> |
|                                      | Mean BP <sup>†</sup> (mmHg)                   | 0.2883  | 0.0571 | 4.44 × 10 <sup>-7</sup> |
| Lipid profiles                       |                                               |         |        |                         |
|                                      | Total cholesterol# (mg/dL)                    | 0.0010  | 0.0004 | 0.0151                  |
|                                      | HDL-cholesterol# (mg/dL)                      | -0.0001 | 0.0005 | 0.8762                  |
|                                      | LDL-cholesterol# (mg/dL)                      | 0.0019  | 0.0006 | 0.0021                  |
|                                      | Triglyceride# (mg/dL)                         | 0.0009  | 0.0012 | 0.4373                  |
|                                      | Non-HDL-cholesterol# (mg/dL)                  | 0.0015  | 0.0006 | 0.0058                  |
|                                      | Remnant cholesterol# (mg/dL)                  | 0.0003  | 0.0014 | 0.8089                  |
| Glucose metabolism                   |                                               |         |        |                         |
|                                      | Fasting plasma glucose <sup>††</sup> (mg/dL)  | 0.0677  | 0.0778 | 0.3840                  |
|                                      | HbA1c <sup>††</sup> (%)                       | -0.0030 | 0.0031 | 0.3386                  |
| Insulin resistance surrogate markers |                                               |         |        |                         |
|                                      | TyG index <sup>#, ††</sup>                    | 0.0032  | 0.0029 | 0.2549                  |
|                                      | TyG-BMI <sup>#, ††</sup> (× 10 <sup>3</sup> ) | 0.0747  | 0.0708 | 0.2914                  |
|                                      | TyG-WC <sup>#, ††</sup> (× 10 <sup>3</sup> )  | 0.3010  | 0.3552 | 0.3966                  |
| Uric acid                            |                                               |         |        |                         |
|                                      | Uric acid <sup>†††</sup> (mg/dL)              | 0.0059  | 0.0058 | 0.3055                  |
| Renal function                       |                                               |         |        |                         |
|                                      | Creatinine (mg/dL)                            | 0.0004  | 0.0014 | 0.7724                  |
|                                      | eGFR (mL/min/1.73 m <sup>2</sup> )            | 0.0961  | 0.1121 | 0.3912                  |
|                                      | Albuminuria (mg/L)                            | -0.0047 | 0.0024 | 0.0486                  |
| Liver function                       |                                               |         |        |                         |
|                                      | AST (U/L)                                     | -0.0147 | 0.0622 | 0.8129                  |
|                                      | ALT (U/L)                                     | 0.1098  | 0.1024 | 0.2839                  |
|                                      | γGT (U/L)                                     | -0.0570 | 0.1647 | 0.7295                  |
|                                      | Serum albumin (g/dL)                          | 0.0005  | 0.0012 | 0.6687                  |
|                                      | Total bilirubin (mg/dL)                       | 0.0001  | 0.0014 | 0.9176                  |
| Hematological parameters             |                                               |         |        |                         |
|                                      | Leukocyte count (10 <sup>3</sup> /μL)         | 0.1793  | 0.1530 | 0.2412                  |
|                                      | Hematocrit (%)                                | 0.0510  | 0.0179 | 0.0043                  |
|                                      | Platelet count (10 <sup>3</sup> /μL)          | 0.4284  | 0.3029 | 0.1573                  |
|                                      | Red blood cell count (10 <sup>6</sup> /μL)    | 0.0034  | 0.0023 | 0.1431                  |
|                                      | Hemoglobin (g/dL)                             | 0.0169  | 0.0065 | 0.0089                  |
| Atherosclerotic risk factors         |                                               |         |        |                         |
|                                      | Gallstone (%)                                 | 0.0229  | 0.0250 | 0.3594                  |
|                                      | Diabetes mellitus (%)                         | 0.0054  | 0.0187 | 0.7716                  |
|                                      | Hypertension (%)                              | 0.0316  | 0.0139 | 0.0228                  |
|                                      | Current smoking (%)                           | -0.0113 | 0.0149 | 0.4492                  |
|                                      | Gout (%)                                      | -0.0158 | 0.0284 | 0.5781                  |
|                                      | Microalbuminuria (%)                          | -0.0308 | 0.0169 | 0.0680                  |
|                                      | Metabolic syndrome (%)                        | 0.0136  | 0.0139 | 0.3255                  |

Adjustment condition, participant recruitment and abbreviation as in Supplementary Table 8.

**Table S14.** Association between *PLEKHH2* rs2060173 genotypes and clinical and laboratory parameters in Taiwan Biobank participants

| Clinical and laboratory parameters   |                                               | beta    | SE     | P value*                |
|--------------------------------------|-----------------------------------------------|---------|--------|-------------------------|
| Anthropology                         |                                               |         |        |                         |
|                                      | Age (years)                                   | 0.1162  | 0.0567 | 0.0405                  |
|                                      | Waist circumference (cm)                      | 0.0024  | 0.0263 | 0.9278                  |
|                                      | Waist-hip ratio                               | 0.0001  | 0.0003 | 0.5937                  |
|                                      | Body mass index (kg/m <sup>2</sup> )          | -0.0093 | 0.0192 | 0.6300                  |
| Blood Pressure                       |                                               |         |        |                         |
|                                      | Systolic BP <sup>†</sup> (mmHg)               | 0.3325  | 0.0793 | 2.74 × 10 <sup>-5</sup> |
|                                      | Diastolic BP <sup>†</sup> (mmHg)              | 0.2650  | 0.0519 | 3.25 × 10 <sup>-7</sup> |
|                                      | Mean BP <sup>†</sup> (mmHg)                   | 0.2875  | 0.0570 | 4.58 × 10 <sup>-7</sup> |
| Lipid profiles                       |                                               |         |        |                         |
|                                      | Total cholesterol# (mg/dL)                    | 0.0011  | 0.0004 | 0.0077                  |
|                                      | HDL-cholesterol# (mg/dL)                      | -0.0001 | 0.0005 | 0.8992                  |
|                                      | LDL-cholesterol# (mg/dL)                      | 0.0020  | 0.0006 | 0.0012                  |
|                                      | Triglyceride# (mg/dL)                         | 0.0010  | 0.0012 | 0.3865                  |
|                                      | Non-HDL-cholesterol# (mg/dL)                  | 0.0017  | 0.0006 | 0.0028                  |
|                                      | Remnant cholesterol# (mg/dL)                  | 0.0006  | 0.0014 | 0.6844                  |
| Glucose metabolism                   |                                               |         |        |                         |
|                                      | Fasting plasma glucose <sup>††</sup> (mg/dL)  | 0.0511  | 0.0777 | 0.5107                  |
|                                      | HbA1c <sup>††</sup> (%)                       | -0.0034 | 0.0031 | 0.2750                  |
| Insulin resistance surrogate markers |                                               |         |        |                         |
|                                      | TyG index <sup>#, ††</sup>                    | 0.0034  | 0.0029 | 0.2371                  |
|                                      | TyG-BMI <sup>#, ††</sup> (× 10 <sup>3</sup> ) | 0.0767  | 0.0707 | 0.2782                  |
|                                      | TyG-WC <sup>#, ††</sup> (× 10 <sup>3</sup> )  | 0.3351  | 0.3546 | 0.3447                  |
| Uric acid                            |                                               |         |        |                         |
|                                      | Uric acid <sup>†††</sup> (mg/dL)              | 0.0060  | 0.0060 | 0.2753                  |
| Renal function                       |                                               |         |        |                         |
|                                      | Creatinine (mg/dL)                            | 0.0004  | 0.0014 | 0.8031                  |
|                                      | eGFR (mL/min/1.73 m <sup>2</sup> )            | 0.1098  | 0.1119 | 0.3267                  |
|                                      | Albuminuria (mg/L)                            | -0.0046 | 0.0024 | 0.0510                  |
| Liver function                       |                                               |         |        |                         |
|                                      | AST (U/L)                                     | -0.0110 | 0.0622 | 0.8601                  |
|                                      | ALT (U/L)                                     | 0.1266  | 0.1027 | 0.2178                  |
|                                      | γGT (U/L)                                     | -0.0379 | 0.1645 | 0.8180                  |
|                                      | Serum albumin (g/dL)                          | 0.0005  | 0.0012 | 0.6727                  |
|                                      | Total bilirubin (mg/dL)                       | 0.0003  | 0.0014 | 0.8385                  |
| Hematological parameters             |                                               |         |        |                         |
|                                      | Leukocyte count (10 <sup>3</sup> /μL)         | 0.1772  | 0.1528 | 0.2463                  |
|                                      | Hematocrit (%)                                | 0.0506  | 0.0178 | 0.0046                  |
|                                      | Platelet count (10 <sup>3</sup> /μL)          | 0.4143  | 0.3025 | 0.1708                  |
|                                      | Red blood cell count (10 <sup>6</sup> /μL)    | 0.0034  | 0.0023 | 0.1417                  |
|                                      | Hemoglobin (g/dL)                             | 0.0171  | 0.0065 | 0.0082                  |
| Atherosclerotic risk factors         |                                               |         |        |                         |
|                                      | Gallstone (%)                                 | 0.0262  | 0.0249 | 0.2935                  |
|                                      | Diabetes mellitus (%)                         | 0.0043  | 0.0187 | 0.8197                  |
|                                      | Hypertension (%)                              | 0.0329  | 0.0139 | 0.0176                  |
|                                      | Current smoking (%)                           | -0.0125 | 0.0149 | 0.4022                  |
|                                      | Gout (%)                                      | -0.0165 | 0.0283 | 0.5600                  |
|                                      | Microalbuminuria (%)                          | -0.0299 | 0.0169 | 0.0757                  |
|                                      | Metabolic syndrome (%)                        | 0.0125  | 0.0138 | 0.3680                  |

Adjustment condition, participant recruitment and abbreviation as in Supplementary Table 8.
